# Supplementary material for: Interleukin-1β Signaling in Dendritic Cells Induces Antiviral Interferon Responses
Source: PubMed Central journal article supplement (PMC5874908; doi:10.1128/mbio.00342-18), 2018-03-20

Figure S2. IL-1 $\beta$  treatment drives inflammatory response genes

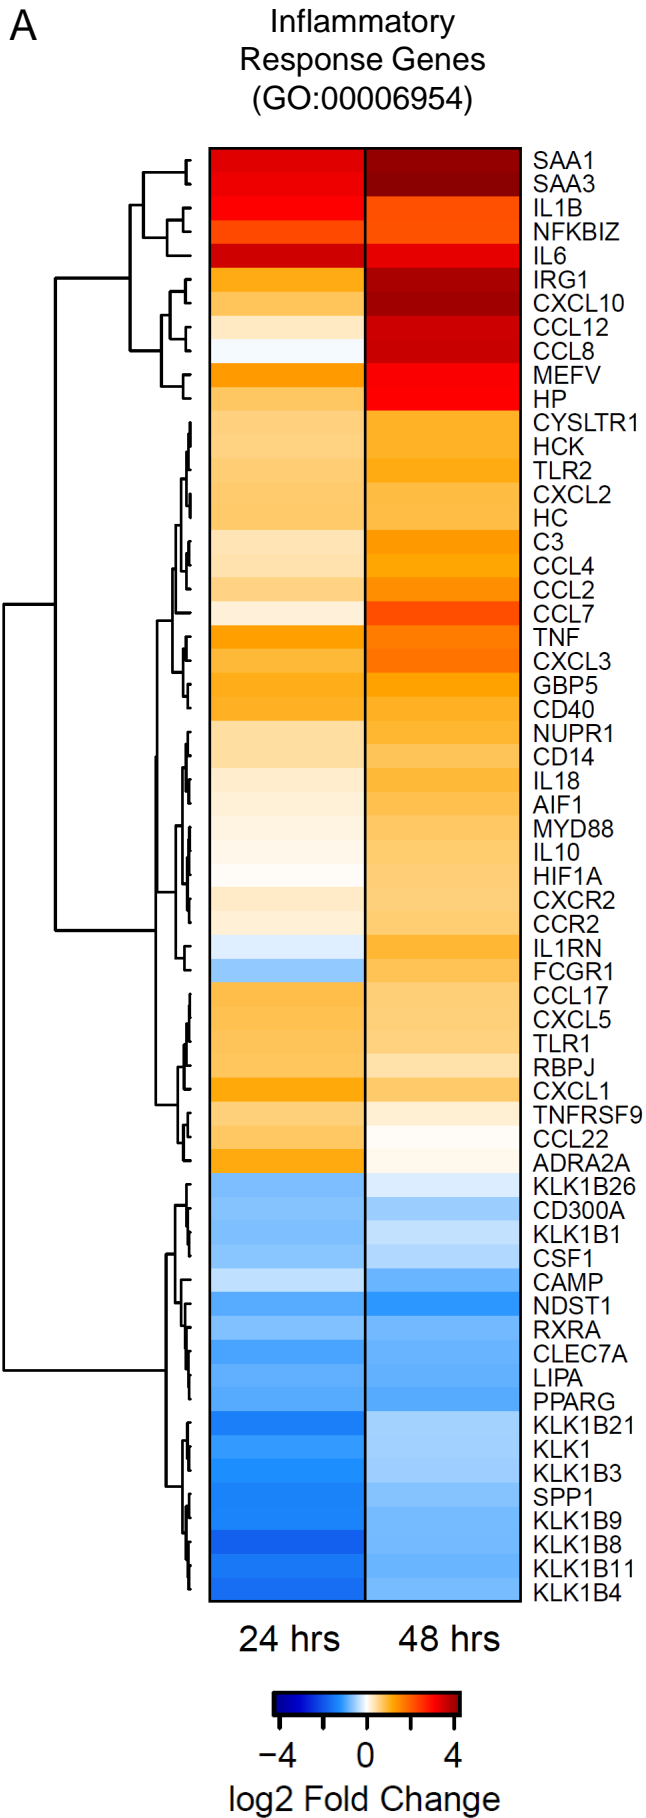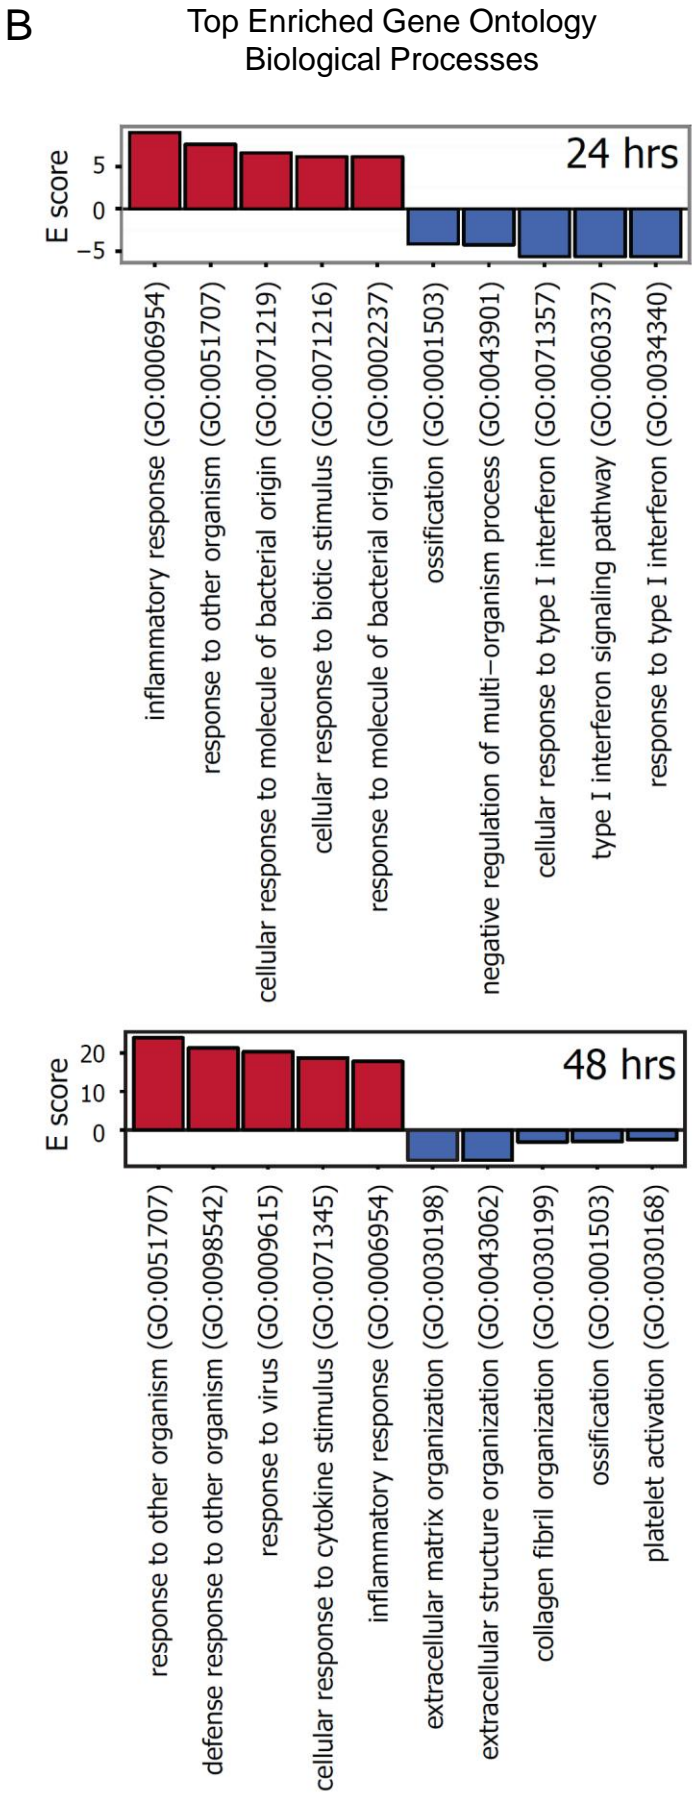

Supplement: mbo002183791sf2.pdf [file mbo002183791sf2.pdf]
